# Supplementary material for: The Use of Continuous Glucose Monitoring With Remote Monitoring Improves Psychosocial Measures in Parents of Children With Type 1 Diabetes: A Randomized Crossover Trial
Source: Oxford University Press journal article supplement (doi:10.2337/dc18-0938), 2018-10-26

## SUPPLEMENTARY DATA

**Supplementary Figure 1. Study design of the randomized crossover trial.** Participants used conventional blood glucose monitoring (control) for three months and the CGM system with remote monitoring (intervention) for three months in the order assigned at randomization. Outcome measures were collected at baseline and after completing each study arm.

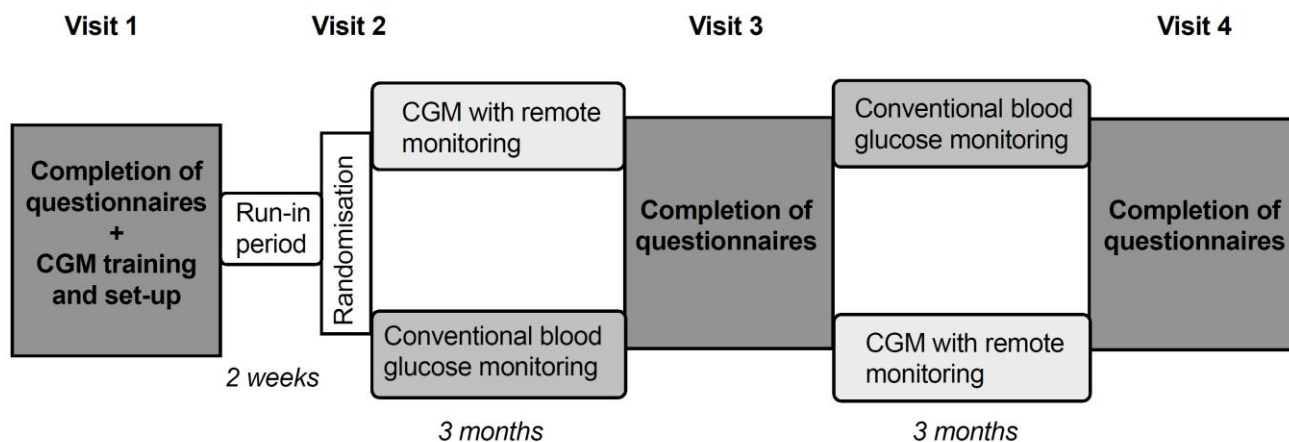

Supplement: dc180938supplementarydata.pdf [file dc180938supplementarydata.pdf]
